# Supplementary material for: The Complete Sequences and Ecological Roles of Two IncP-1β Plasmids, pHB44 and pBS64, Isolated from the Mycosphere of Laccaria proxima
Source: PubMed Central journal article supplement (PMC4914505; doi:10.3389/fmicb.2016.00909), 2016-06-21
Supplement: Table1.pdf [file Table1.pdf]

**Supplementary Table S1.** Putative coding regions of plasmid pHB44 and their predicted functions.

| CDS     | Start position | Stop position | Length (bp) | G+C content (%) | Predicted Function                                        | Protein length (aa) | Protein size (kDa) | Identity (%) to: |      |
|---------|----------------|---------------|-------------|-----------------|-----------------------------------------------------------|---------------------|--------------------|------------------|------|
|         |                |               |             |                 |                                                           |                     |                    | pMBUI8           | R751 |
| trfA    | 1221           | 1             | 1221        | 65              | replication initiation protein                            | 406                 | 45.8               | 100              | 99   |
| ssb     | 1609           | 1268          | 342         | 60              | primosome PriB, single-strand DNA-binding                 | 113                 | 12.7               | 100              | 100  |
| trbA    | 1723           | 2085          | 363         | 59              | conjugative transfer protein                              | 120                 | 13.3               | 100              | 100  |
| trbB    | 2395           | 3357          | 963         | 62              | conjugative transfer protein, ATPase                      | 320                 | 35.1               | 100              | 99   |
| trbC    | 3374           | 3838          | 465         | 67              | conjugative transfer protein, prepilin                    | 154                 | 16.4               | 100              | 99   |
| trbD    | 3842           | 4153          | 312         | 63              | conjugative transfer protein                              | 103                 | 11.8               | 100              | 99   |
| trbE    | 4150           | 6708          | 2559        | 64              | conjugative transfer protein                              | 852                 | 94.0               | 100              | 99   |
| trbF    | 6705           | 7487          | 783         | 66              | conjugative transfer protein                              | 260                 | 28.7               | 100              | 99   |
| trbG    | 7505           | 8404          | 900         | 64              | conjugative transfer protein                              | 299                 | 32.7               | 100              | 99   |
| trbH    | 8407           | 8904          | 498         | 71              | conjugative transfer protein                              | 165                 | 17.6               | 99               | 99   |
| trbI    | 8901           | 10322         | 1422        | 67              | conjugative transfer protein                              | 473                 | 49.4               | 100              | 99   |
| trbJ    | 10343          | 11107         | 765         | 61              | conjugative transfer protein                              | 254                 | 27.5               | 100              | 99   |
| trbK    | 11117          | 11344         | 228         | 62              | conjugative transfer entry exclusion protein              | 75                  | 8.0                | 100              | 99   |
| trbL    | 11346          | 13073         | 1728        | 68              | conjugative transfer protein                              | 575                 | 56.2               | 100              | 99   |
| trbM    | 13091          | 13678         | 588         | 67              | conjugative transfer protein                              | 195                 | 21.6               | 100              | 100  |
| trbN    | 13692          | 14327         | 636         | 69              | conjugative transfer protein                              | 211                 | 22.8               | 99               | 99   |
| trbO    | 14356          | 14622         | 267         | 63              | conjugative transfer protein                              | 88                  | 9.9                | 99               | 99   |
| trbP    | 14622          | 15320         | 699         | 68              | conjugative transfer protein                              | 232                 | 25.7               | 100              | 99   |
| upf30.5 | 15336          | 15767         | 432         | 66              | outer membrane protein, major outer membrane lipoprotein, | 143                 | 15.1               | 100              | 99   |

## S-adenosyl-L-methionine-dependent

|         |       |       |      |    |                                                                                                                                                                                                                   |     |      |     |     |
|---------|-------|-------|------|----|-------------------------------------------------------------------------------------------------------------------------------------------------------------------------------------------------------------------|-----|------|-----|-----|
| upf31.0 | 15838 | 16596 | 759  | 65 | major outer membrane protein, methyltransferase                                                                                                                                                                   | 252 | 28.3 | 99  | 100 |
| parA    | 17353 | 16598 | 756  | 70 | resolvase                                                                                                                                                                                                         | 251 | 27.4 | 100 | -   |
| orf1    | 17642 | 17857 | 216  | 62 | hypothetical protein, protein of unknown function DUF3018                                                                                                                                                         | 71  | 8.2  | 100 | -   |
| pemK    | 17857 | 18177 | 321  | 56 | mRNA interferase PemK-like protein, plasmid maintenance toxin/<br>cell growth inhibitor                                                                                                                           | 106 | 11.6 | 100 | -   |
| tniR    | 18413 | 18976 | 564  | 68 | resolvase                                                                                                                                                                                                         | 187 | 20   | 100 | -   |
| tnp     | 19239 | 19565 | 327  | 59 | mobile element protein, transposase IS3/ IS911 family protein                                                                                                                                                     | 108 | 11.8 | -   | -   |
| dip2    | 19580 | 20431 | 852  | 60 | mobile element protein, HTH-like domain, ribonuclease H-like domain,<br>integrase, catalytic region. Protein has features of membrane protein fhuA,<br>predicted to bind ferrichrome-metal complexes from milieu. | 283 | 33.0 | -   | -   |
| mmfA    | 20976 | 21311 | 336  | 62 | integral membrane protein, propeptide, pepSy, peptidase M4                                                                                                                                                        | 111 | 11.9 | 100 | -   |
| uppB    | 21368 | 21964 | 597  | 59 | Undecaprenyl pyrophosphate phosphatase. Resembles Cd protein.<br>Confers bacitracin resistance due to UPP activity.                                                                                               | 198 | 21.8 | 100 | -   |
| mmfC1   | 22035 | 22817 | 783  | 62 | integral membrane protein, hypothetical protein, putative permease,<br>protein of unknown function DUF347                                                                                                         | 260 | 28.1 | -   | -   |
| mmfD    | 22847 | 23296 | 450  | 59 | secreted protein (Tn6048)                                                                                                                                                                                         | 149 | 15.4 | -   | -   |
| mmfC2   | 23306 | 24064 | 759  | 63 | integral membrane protein, putative permease of the Major Facilitator<br>Superfamily (Tn6048), protein of unknown function DUF347                                                                                 | 252 | 26.5 | -   | -   |
| mmfR    | 24087 | 24752 | 666  | 62 | two component transcriptional regulator, signal transduction response regulator,<br>CheY-like superfamily                                                                                                         | 221 | 23.8 | -   | -   |
| mmfS    | 24728 | 26080 | 1353 | 60 | signal transduction histidine kinase (Tn6048)                                                                                                                                                                     | 450 | 49.2 | -   | -   |
| eamA    | 26109 | 26540 | 432  | 56 | putative membrane protein TN6048, eamA domain                                                                                                                                                                     | 143 | 15.3 | -   | -   |
| tniR    | 27275 | 26607 | 669  | 62 | resolvase                                                                                                                                                                                                         | 222 | 23.9 | -   | 76  |

|         |       |       |      |    |                                                                                                                             |      |       |     |     |
|---------|-------|-------|------|----|-----------------------------------------------------------------------------------------------------------------------------|------|-------|-----|-----|
| tnp     | 28988 | 27441 | 1548 | 64 | transposase IS801/ IS1294, transposase zinc binding domain                                                                  | 515  | 56.6  | 98  | -   |
| ldpA    | 29689 | 29099 | 591  | 66 | FAD/NAD-linked reductase, pyridine nucleotide-disulphide oxidoreductase, dihydrolipoamide dehydrogenase                     | 196  | 20.2  | 93  | -   |
| tnp-Tn3 | 32685 | 29836 | 2850 | 60 | mobile element protein, Tn3 family transposase, domain of unknown function DUF4158                                          | 949  | 106.1 | 99  | -   |
| traC    | 37388 | 33042 | 4347 | 69 | DNA processing protein, DNA primase                                                                                         | 1448 | 159.0 | 99  | 99  |
| traD    | 37781 | 37392 | 390  | 72 | DNA transfer protein                                                                                                        | 129  | 13.6  | 99  | 99  |
| traE    | 39866 | 37803 | 2064 | 67 | DNA processing protein, DNA topoisomerase III                                                                               | 687  | 74.9  | 100 | 99  |
| traF    | 40414 | 39878 | 537  | 66 | DNA transfer maturation peptidase protein                                                                                   | 178  | 18.9  | 100 | 99  |
| traG    | 42324 | 40411 | 1914 | 66 | DNA transfer coupling protein                                                                                               | 637  | 69.9  | 99  | 99  |
| traI    | 44561 | 42321 | 2241 | 67 | DNA relaxase protein                                                                                                        | 746  | 82.1  | 100 | 99  |
| traJ    | 44970 | 44596 | 375  | 67 | oriT binding protein                                                                                                        | 124  | 14.2  | 100 | 100 |
| traK    | 45344 | 45742 | 399  | 63 | oriT binding protein                                                                                                        | 132  | 14.6  | 100 | 99  |
| traL    | 45742 | 46467 | 726  | 63 | DNA transfer protein                                                                                                        | 241  | 26.4  | 100 | 99  |
| traM    | 46467 | 46907 | 441  | 68 | DNA transfer protein                                                                                                        | 146  | 15.6  | 100 | 100 |
| traN    | 47763 | 47110 | 654  | 69 | DNA transfer protein                                                                                                        | 217  | 24.1  | 100 | 99  |
| traO    | 48139 | 47792 | 348  | 58 | DNA transfer protein                                                                                                        | 115  | 12.5  | 100 | 99  |
| kfrA    | 49341 | 48310 | 1032 | 75 | regulatory protein                                                                                                          | 343  | 36.8  | 100 | 99  |
| korB    | 50570 | 49521 | 1050 | 67 | transcriptional repressor protein, plasmid partitioning protein, parB/ Sulfiredoxin                                         | 349  | 38.2  | 100 | 99  |
| incC1   | 51331 | 50567 | 765  | 64 | partitioning protein, P-loop containing nucleoside triphosphate hydrolase, cobQ/ cobB/ minD/ parA nucleotide binding domain | 254  | 27.7  | 100 | 100 |
| korA    | 51630 | 51328 | 312  | 62 | transcriptional repressor protein                                                                                           | 100  | 11.0  | 100 | 100 |
| kleF    | 52274 | 51744 | 531  | 69 | protein of unknown function DUF2761                                                                                         | 176  | 18.7  | 100 | 99  |

|      |       |       |      |    |                                                                                                     |     |      |     |     |
|------|-------|-------|------|----|-----------------------------------------------------------------------------------------------------|-----|------|-----|-----|
| kleE | 52605 | 52276 | 330  | 65 | stable inheritance protein                                                                          | 109 | 12.0 | 100 | 100 |
| kleB | 52965 | 52750 | 216  | 63 | protein of unknown function DUF2688, possible transcriptional regulation                            | 71  | 7.7  | 100 | 100 |
| kleA | 53260 | 53024 | 237  | 64 | stable inheritance protein                                                                          | 78  | 8.6  | 100 | 100 |
| korC | 53677 | 53420 | 258  | 70 | transcriptional repressor protein                                                                   | 85  | 9.3  | 100 | 99  |
| klcB | 54899 | 53694 | 1206 | 70 | stable inheritance protein                                                                          | 401 | 42.7 | 99  | 99  |
| klcA | 55379 | 54951 | 429  | 69 | antirestriction protein                                                                             | 142 | 15.7 | 100 | 100 |
| kluA | 55536 | 55817 | 270  | 67 | addiction module antitoxin protein, uncharacterised protein family UPF0156/<br>metJ/ arc repressor  | 93  | 10.2 | 100 | 100 |
| kluB | 55814 | 56128 | 315  | 65 | addiction module toxin protein, MSL3420 protein, toxin-antitoxin system,<br>relE/ parE toxin family | 104 | 11.6 | 100 | 99  |

---
