# Supplementary material for: The Complete Sequences and Ecological Roles of Two IncP-1β Plasmids, pHB44 and pBS64, Isolated from the Mycosphere of Laccaria proxima
Source: PubMed Central journal article supplement (PMC4914505; doi:10.3389/fmicb.2016.00909), 2016-06-21
Supplement: Table2.pdf [file Table2.pdf]

**Supplementary Table S2.** Putative coding regions of plasmid pBS64 and their predicted functions.

| CDS     | Start position | Stop position | Length (bp) | G+C content (%) | Predicted Function                                        | Protein length (aa) | Protein size (kDa) | Identity (%) to: |      |
|---------|----------------|---------------|-------------|-----------------|-----------------------------------------------------------|---------------------|--------------------|------------------|------|
|         |                |               |             |                 |                                                           |                     |                    | pMBUI8           | R751 |
| trfA    | 1029           | 1             | 1029        | 65              | replication initiation protein                            | 342                 | 39.1               | 100              | 99   |
| ssb     | 1608           | 1267          | 342         | 60              | primosome PriB, single-strand DNA-binding                 | 113                 | 12.7               | 100              | 100  |
| trbA    | 1722           | 2084          | 363         | 59              | conjugative transfer protein                              | 120                 | 13.3               | 100              | 100  |
| trbB    | 2394           | 3356          | 963         | 62              | conjugative transfer protein, ATPase                      | 320                 | 35.1               | 100              | 99   |
| trbC    | 3373           | 3837          | 465         | 67              | conjugative transfer protein, prepilin                    | 154                 | 16.4               | 100              | 99   |
| trbD    | 3841           | 4152          | 312         | 63              | conjugative transfer protein                              | 103                 | 11.8               | 100              | 99   |
| trbE    | 4149           | 6707          | 2559        | 64              | conjugative transfer protein                              | 852                 | 94.0               | 100              | 99   |
| trbF    | 6704           | 7486          | 783         | 66              | conjugative transfer protein                              | 260                 | 28.7               | 100              | 99   |
| trbG    | 7504           | 8403          | 900         | 64              | conjugative transfer protein                              | 299                 | 32.7               | 100              | 99   |
| trbH    | 8406           | 8894          | 489         | 71              | conjugative transfer protein                              | 162                 | 17.0               | 100              | 99   |
| trbI    | 8899           | 10320         | 1422        | 67              | conjugative transfer protein                              | 473                 | 49.4               | 100              | 99   |
| trbJ    | 10341          | 11105         | 765         | 61              | conjugative transfer protein                              | 254                 | 27.5               | 100              | 99   |
| trbK    | 11115          | 11342         | 228         | 62              | conjugative transfer entry exclusion protein              | 75                  | 8.0                | 100              | 99   |
| trbL    | 11353          | 13071         | 1719        | 68              | conjugative transfer protein                              | 572                 | 55.9               | 100              | 99   |
| trbM    | 13089          | 13676         | 588         | 67              | conjugative transfer protein                              | 195                 | 21.6               | 100              | 100  |
| trbN    | 13690          | 14325         | 636         | 69              | conjugative transfer protein                              | 211                 | 22.8               | 99               | 99   |
| trbO    | 14354          | 14620         | 267         | 63              | conjugative transfer protein                              | 88                  | 9.9                | 99               | 99   |
| trbP    | 14620          | 15318         | 699         | 68              | conjugative transfer protein                              | 232                 | 25.7               | 100              | 99   |
| upf30.5 | 15334          | 15765         | 432         | 66              | outer membrane protein, major outer membrane lipoprotein, | 143                 | 15.1               | 100              | 99   |

## S-adenosyl-L-methionine-dependent

|            |       |       |     |    |                                                                                                                                                                                                                   |     |      |     |    |
|------------|-------|-------|-----|----|-------------------------------------------------------------------------------------------------------------------------------------------------------------------------------------------------------------------|-----|------|-----|----|
| upf31.0    | 15836 | 16594 | 759 | 65 | major outer membrane protein, methyltransferase                                                                                                                                                                   | 252 | 28.4 | 99  | 99 |
| parA       | 17351 | 16596 | 756 | 70 | resolvase                                                                                                                                                                                                         | 251 | 27.4 | 100 | -  |
| orf1       | 17640 | 17855 | 216 | 62 | hypothetical protein, protein of unknown function DUF3018                                                                                                                                                         | 71  | 8.2  | 100 | -  |
| pemK       | 17855 | 18175 | 321 | 56 | mRNA interferase PemK-like protein, plasmid maintenance toxin/<br>cell growth inhibitor                                                                                                                           | 106 | 11.6 | 100 | -  |
| tniR       | 18411 | 18974 | 564 | 68 | resolvase                                                                                                                                                                                                         | 187 | 20.0 | 100 | -  |
| tnp        | 19237 | 19563 | 327 | 59 | mobile element protein, transposase IS3/ IS911 family protein                                                                                                                                                     | 108 | 11.8 | -   | -  |
| dip2       | 19578 | 20429 | 852 | 60 | mobile element protein, HTH-like domain, ribonuclease H-like domain,<br>integrase, catalytic region. Protein has features of membrane protein fhuA,<br>predicted to bind ferrichrome-metal complexes from milieu. | 283 | 33.0 | -   | -  |
| mmfA       | 20974 | 21309 | 336 | 62 | integral membrane protein, propeptide, pepSy, peptidase M4                                                                                                                                                        | 111 | 11.9 | 100 | -  |
| uppB       | 21321 | 21962 | 642 | 59 | Undecaprenyl pyrophosphate phosphatase. Resembles Cd protein.<br>Confers bacitracin resistance due to UPP activity.                                                                                               | 213 | 23.4 | 100 | -  |
| mmfC1      | 22033 | 22815 | 783 | 62 | integral membrane protein, hypothetical protein, putative permease,<br>protein of unknown function DUF347                                                                                                         | 260 | 28.1 | -   | -  |
| mmfD       | 22845 | 23294 | 450 | 59 | secreted protein (Tn6048)                                                                                                                                                                                         | 149 | 15.4 | -   | -  |
| mmfC2      | 23304 | 24062 | 759 | 63 | integral membrane protein, putative permease of the Major Facilitator<br>Superfamily (Tn6048), protein of unknown function DUF347                                                                                 | 252 | 26.5 | -   | -  |
| ins1/ tnp  | 24152 | 24478 | 327 | 59 | mobile element protein, transposase IS3/ IS911 family protein                                                                                                                                                     | 108 | 11.8 | -   | -  |
| ins2/ dip2 | 24493 | 25344 | 852 | 60 | mobile element protein, HTH-like domain, ribonuclease H-like domain,<br>integrase, catalytic region. Protein has features of membrane protein fhuA,<br>predicted to bind ferrichrome-metal complexes from milieu. | 283 | 33.1 | -   | -  |
| mmfR       | 25384 | 26049 | 666 | 62 | two component transcriptional regulator, signal transduction response regulator,                                                                                                                                  | 221 | 23.9 | -   | -  |

CheY-like superfamily

|         |       |       |      |    |                                                                                                         |      |       |     |     |
|---------|-------|-------|------|----|---------------------------------------------------------------------------------------------------------|------|-------|-----|-----|
| mmfS    | 26025 | 27377 | 1353 | 60 | signal transduction histidine kinase (Tn6048)                                                           | 450  | 49.2  | -   | -   |
| eamA    | 27406 | 27837 | 432  | 56 | putative membrane protein TN6048, eamA domain                                                           | 143  | 15.3  | -   | -   |
| tniR    | 28572 | 27904 | 669  | 62 | resolvase                                                                                               | 222  | 23.9  | -   | 76  |
| tnp     | 30285 | 28738 | 1548 | 64 | transposase IS801/ IS1294, transposase zinc binding domain                                              | 515  | 56.6  | 98  | -   |
| ldpA    | 30984 | 30394 | 591  | 66 | FAD/NAD-linked reductase, pyridine nucleotide-disulphide oxidoreductase, dihydrolipoamide dehydrogenase | 196  | 20.2  | 93  | -   |
| tnp-Tn3 | 34046 | 31131 | 2916 | 60 | mobile element protein, Tn3 family transposase, domain of unknown function DUF4158                      | 971  | 108.7 | 99  | -   |
| traC    | 38683 | 34337 | 4347 | 69 | DNA processing protein, DNA primase                                                                     | 1448 | 159.0 | 99  | 99  |
| traD    | 39076 | 38687 | 390  | 72 | DNA transfer protein                                                                                    | 129  | 13.6  | 99  | 99  |
| traE    | 41161 | 39098 | 2064 | 67 | DNA processing protein, DNA topoisomerase III                                                           | 687  | 74.9  | 100 | 99  |
| traF    | 41709 | 41173 | 537  | 66 | DNA transfer maturation peptidase protein                                                               | 178  | 18.9  | 100 | 99  |
| traG    | 43619 | 41706 | 1914 | 66 | DNA transfer coupling protein                                                                           | 637  | 69.9  | 99  | 99  |
| traI    | 45856 | 43616 | 2241 | 67 | DNA relaxase protein                                                                                    | 746  | 82.1  | 100 | 99  |
| traJ    | 46265 | 45891 | 375  | 67 | oriT binding protein                                                                                    | 124  | 14.2  | 100 | 100 |
| traK    | 46639 | 47037 | 399  | 63 | oriT binding protein                                                                                    | 132  | 14.6  | 100 | 99  |
| traL    | 47037 | 47762 | 726  | 63 | DNA transfer protein                                                                                    | 241  | 26.4  | 100 | 99  |
| traM    | 47762 | 48202 | 441  | 68 | DNA transfer protein                                                                                    | 146  | 15.6  | 100 | 100 |
| traN    | 49058 | 48405 | 654  | 69 | DNA transfer protein                                                                                    | 217  | 24.1  | 100 | 99  |
| traO    | 49434 | 49087 | 348  | 58 | DNA transfer protein                                                                                    | 115  | 12.5  | 100 | 99  |
| kfrA    | 50636 | 49605 | 1032 | 75 | regulatory protein                                                                                      | 343  | 36.8  | 100 | 99  |
| korB    | 51865 | 50816 | 1050 | 67 | transcriptional repressor protein, plasmid partitioning protein, parB/ Sulfiredoxin                     | 349  | 38.2  | 100 | 99  |

|       |       |       |      |    |                                                                                                                                |     |      |     |     |
|-------|-------|-------|------|----|--------------------------------------------------------------------------------------------------------------------------------|-----|------|-----|-----|
| incC1 | 52626 | 51862 | 765  | 64 | partitioning protein, P-loop containing nucleoside triphosphate hydrolase,<br>cobQ/ cobB/ minD/ parA nucleotide binding domain | 254 | 27.7 | 100 | 100 |
| korA  | 52925 | 52623 | 303  | 62 | transcriptional repressor protein                                                                                              | 100 | 11.0 | 100 | 100 |
| kleF  | 53569 | 53039 | 531  | 69 | protein of unknown function DUF2761                                                                                            | 176 | 18.7 | 100 | 99  |
| kleE  | 53900 | 53571 | 330  | 65 | stable inheritance protein                                                                                                     | 109 | 12.0 | 100 | 100 |
| kleB  | 54260 | 54045 | 216  | 63 | protein of unknown function DUF2688, possible transcriptional regulation                                                       | 71  | 7.7  | 100 | 100 |
| kleA  | 54555 | 54319 | 237  | 64 | stable inheritance protein                                                                                                     | 78  | 8.6  | 100 | 100 |
| korC  | 54972 | 54715 | 258  | 70 | transcriptional repressor protein                                                                                              | 85  | 9.3  | 100 | 99  |
| klcB  | 56194 | 54989 | 1207 | 70 | stable inheritance protein                                                                                                     | 283 | 29.4 | 99  | 99  |
| klcA  | 56674 | 56246 | 429  | 69 | antirestriction protein                                                                                                        | 142 | 15.7 | 100 | 100 |
| kluA  | 56831 | 57112 | 282  | 67 | addiction module antitoxin protein, uncharacterised protein family UPF0156/<br>metJ/ arc repressor                             | 93  | 10.2 | 100 | 100 |
| kluB  | 57109 | 57423 | 315  | 65 | addiction module toxin protein, MSL3420 protein, toxin-antitoxin system,<br>relE/ parE toxin family                            | 104 | 11.6 | 100 | 99  |

---
